# Supplementary material
Source: PubMed Central journal article supplement (PMC6919561)
Supplement: NIHMS1543109-supplement-1.pdf [file NIHMS1543109-supplement-1.pdf]

# **Toward Directing Opioid Receptor Signaling to Refine Opioid Therapeutics**

Travis W. Grim, Agnes Acevedo-Canabal and Laura M. Bohn

## ***Supplemental Information***

**TABLE S1. Opioid Effects in Genetic Models with Disrupted MOR Regulation**

**Antinociception and Tolerance**

| Genetic Model                                    | Drug                        | Response                  | Effect Relative to WT | Ref         |    |
|--------------------------------------------------|-----------------------------|---------------------------|-----------------------|-------------|----|
| βarrestin2-KO mice                               | Morphine                    | Hot plate latency         | Enhanced, prolonged   | 8,11,10, 23 |    |
|                                                  | Morphine (sc daily, pellet) | Hot plate tolerance       | Decreased             | 9,11        |    |
|                                                  | Morphine (pump)             | Hot plate tolerance       | Decreased             | 23          |    |
|                                                  | Morphine                    | Tail flick latency        | Enhanced, prolonged   | 11,12       |    |
|                                                  | Morphine (sc daily)         | Tail flick tolerance      | Delayed, but present  | 11          |    |
|                                                  | Heroin                      | Hot plate latency         | Enhanced, prolonged   | 10          |    |
|                                                  | Etorphine                   | Hot plate latency         | No change             | 10          |    |
|                                                  | Fentanyl                    | Hot plate latency         | No change             | 10, 23      |    |
|                                                  | Fentanyl (pump)             | Hot plate tolerance       | No change             | 23          |    |
|                                                  | Oxycodone                   | Hot plate latency         | No change             | 23          |    |
|                                                  | Oxycodone (pump)            | Hot plate tolerance       | No change             | 23          |    |
|                                                  | Methadone                   | Hot plate latency         | No change             | 23          |    |
|                                                  | Methadone (pump)            | Hot plate tolerance       | No change             | 23          |    |
|                                                  | βarrestin2 Antigene mice    | Morphine                  | Hot plate latency     | Enhanced    | 13 |
|                                                  |                             | Morphine (sc daily)       | Hot plate tolerance   | Decreased   | 13 |
| βarrestin2 siRNA PAG mice                        | Morphine                    | Hot plate latency         | Enhanced              | 14          |    |
|                                                  | Morphine (sc daily)         | Hot plate tolerance       | Decreased             | 14          |    |
| βarrestin2 siRNA it rats                         | Morphine                    | Tail flick latency        | Enhanced, prolonged   | 15          |    |
|                                                  | Morphine (it daily)         | Tail flick tolerance      | Decreased             | 15          |    |
| βarrestin1-KO mice                               | Morphine                    | Hot plate latency         | No change             | 10          |    |
| βarrestin1 siRNA PAG mice                        | Morphine                    | Hot plate latency         | No change             | 14          |    |
|                                                  | Morphine (sc daily)         | Hot plate tolerance       | No change             | 14          |    |
| GRK3, 4, or 6-KO mice                            | Morphine                    | Hot plate latency         | No change             | 18, 19, 24  |    |
| GRK3-KO mice                                     | Morphine (pellet)           | Hot plate tolerance       | No change             | 24          |    |
|                                                  | Morphine (sc daily)         | Hot plate tolerance       | No change             | 19          |    |
|                                                  | Fentanyl                    | Hot plate latency         | No change             | 24          |    |
|                                                  | Fentanyl (pump)             | Hot plate tolerance       | Decreased             | 24          |    |
|                                                  | Fentanyl (sc daily)         | Hot plate acute tolerance | Decreased             | 19          |    |
|                                                  | Etonitazene (sc daily)      | Hot plate tolerance       | Decreased             | 19          |    |
|                                                  | GRK5-KO mice                | Morphine                  | Hot plate latency     | Decreased   | 19 |
| Morphine (sc daily)                              |                             | Hot plate tolerance       | No change             | 19          |    |
| GRK6-KO mice                                     | Morphine (pump)             | Hot plate tolerance       | No change             | 23          |    |
| Phosphorylation deficient C terminus of MOR mice | Morphine                    | Hot plate latency         | Enhanced              | 21          |    |
|                                                  | Morphine (pump)             | Hot plate tolerance       | Decreased             | 21          |    |
|                                                  | Fentanyl                    | Hot plate latency         | Enhanced              | 21          |    |
|                                                  | Fentanyl (pump)             | Hot plate tolerance       | Decreased             | 21          |    |
| MOR S375A mice                                   | Fentanyl (sc daily)         | Hot plate tolerance       | Decreased             | 25          |    |
|                                                  | Etonitazene (sc daily)      | Hot plate tolerance       | Decreased             | 25          |    |
|                                                  | Morphine (sc daily)         | Hot plate tolerance       | No change             | 25          |    |
| MOR C-terminus truncation mice                   | Morphine (sc daily)         | Tail flick tolerance      | Decreased             | 22          |    |

**Physical Dependence and Withdrawal**

|                                                  |                     |                                  |           |    |
|--------------------------------------------------|---------------------|----------------------------------|-----------|----|
| βarrestin2-KO mice                               | Morphine (pellet)   | Naloxone-precipitated withdrawal | No change | 9  |
|                                                  | Morphine (pump)     | Naloxone-precipitated withdrawal | Decreased | 23 |
| βarrestin2 siRNA i.t. rats                       | Morphine (it daily) | Naloxone-precipitated withdrawal | Decreased | 15 |
| GRK3-KO mice                                     | Fentanyl (pump)     | Naloxone-precipitated withdrawal | No change | 24 |
| GRK5-KO mice                                     | Morphine (sc daily) | Naloxone-precipitated withdrawal | Decreased | 19 |
| GRK6-KO mice                                     | Morphine (pump)     | Naloxone-precipitated withdrawal | No change | 20 |
| S375A mice                                       | Morphine (pump)     | Naloxone-precipitated withdrawal | No change | 21 |
|                                                  | Fentanyl (pump)     | Naloxone-precipitated withdrawal | No change | 21 |
| Phosphorylation deficient C terminus of MOR mice | Morphine (pump)     | Naloxone-precipitated withdrawal | No change | 21 |
|                                                  | Fentanyl (pump)     | Naloxone-precipitated withdrawal | No change | 21 |
| MOR C-terminus truncation mice                   | Morphine (sc daily) | Naloxone-precipitated withdrawal | Decreased | 22 |
| exon4-encoded C terminus deletion mice           | Morphine (sc daily) | Naloxone-precipitated withdrawal | Decreased | 22 |
| exon7-encoded C terminus deletion mice           | Morphine (sc daily) | Naloxone-precipitated withdrawal | No change | 22 |

## Constipation

|                                                  |          |                                                              |                                                 |           |
|--------------------------------------------------|----------|--------------------------------------------------------------|-------------------------------------------------|-----------|
| βarrestin2-KO mice                               | Morphine | Accumulation of fecal boli                                   | Increased                                       | 33        |
|                                                  |          | Small intestinal transit - orally administered charcoal meal | No change                                       | 33        |
|                                                  |          | Large intestine transit - colonic bead expulsion             | Decreased delay                                 | 33        |
| GRK6-KO mice                                     | Morphine | Accumulation of fecal boli                                   | Increased                                       | 20        |
|                                                  |          | Small intestinal transit - orally administered charcoal meal | No change                                       | 20        |
|                                                  |          | Large intestine transit - colonic bead expulsion             | Decreased delay                                 | 20        |
| MOR S375A mice                                   | Morphine | Accumulation of fecal boli                                   | No change                                       | 21        |
|                                                  | Fentanyl | Accumulation of fecal boli                                   | No change                                       | 21        |
| Phosphorylation deficient C terminus of MOR mice | Morphine | Accumulation of fecal boli                                   | No change with enhanced potency in constipation | 21        |
|                                                  |          | Fentanyl                                                     | Accumulation of fecal boli                      | No change |
| MOR C-terminus truncation mice                   | Morphine | Small intestinal transit - orally administered charcoal meal | No change                                       | 22        |
| exon4-encoded C terminus deletion mice           | Morphine | Small intestinal transit - orally administered charcoal meal | Increased distance                              | 22        |
| exon7-encoded C terminus deletion mice           | Morphine | Small intestinal transit - orally administered charcoal meal | No change                                       | 22        |

## Respiratory Suppression

|                                                  |          |                         |                                                            |                                                            |
|--------------------------------------------------|----------|-------------------------|------------------------------------------------------------|------------------------------------------------------------|
| βarrestin2-KO mice                               | Morphine | Respiratory suppression | Decreased                                                  | 33                                                         |
| MOR S375A mice                                   | Morphine | Respiratory suppression | No change                                                  | 21                                                         |
|                                                  | Fentanyl | Respiratory suppression | No change                                                  | 21                                                         |
| Phosphorylation deficient C terminus of MOR mice | Morphine | Respiratory suppression | No change with enhanced potency in respiratory suppression | 21                                                         |
|                                                  |          | Fentanyl                | Respiratory suppression                                    | No change with enhanced potency in respiratory suppression |

## Running Behaviors and Reward

|                                                  |          |                    |                                 |        |
|--------------------------------------------------|----------|--------------------|---------------------------------|--------|
| βarrestin2-KO mice                               | Morphine | Locomotor activity | Decreased                       | 36, 37 |
|                                                  | Morphine | CPP                | Develop robust and enhanced CPP | 36     |
| βarrestin1-KO mice                               | Morphine | Locomotor activity | No change                       | 37     |
| GRK3-KO mice                                     | Morphine | CPP                | No change                       | 19     |
| GRK5-KO mice                                     | Morphine | CPP                | Did not develop CPP             | 19     |
| MOR S375A mice                                   | Morphine | CPP                | No change                       | 19     |
| Phosphorylation deficient C terminus of MOR mice | Morphine | Locomotor activity | No change                       | 21     |
|                                                  | Fentanyl | Locomotor activity | No change                       | 21     |
|                                                  | Morphine | CPP                | No change                       | 21     |
|                                                  | Fentanyl | CPP                | No change                       | 21     |

*Subcutaneous, sc; intrathecal, it; conditioned-place preference, CPP.*

**TABLE S2. In Vitro Pharmacology of Compounds Compared in this Review for Biased Agonism.**

| MOR Receptor Activity |                                           |                                                                              |                                                |                                                                                                          |     |
|-----------------------|-------------------------------------------|------------------------------------------------------------------------------|------------------------------------------------|----------------------------------------------------------------------------------------------------------|-----|
| Compound              | Assay 1 G protein                         | Assay 2 $\beta$ arrestin2                                                    | Bias Calculation Method                        | Conclusion                                                                                               | Ref |
| <b>DAMGO</b>          | GTP $\gamma$ S binding, cAMP accumulation | $\beta$ arrestin2 enzyme complementation assay and BRET                      | Black-Leff operational model-no data provided* | Equal between assays                                                                                     | 46  |
|                       | GTP $\gamma$ S binding, cAMP accumulation | $\beta$ arrestin2 enzyme complementation assay                               | Black-Leff operational model                   | Equal between assays                                                                                     | 60  |
| <b>Morphine</b>       | GTP $\gamma$ S binding, cAMP accumulation | $\beta$ arrestin2 enzyme complementation assay and BRET                      | Black-Leff operational model-no data provided* | Equal between assays                                                                                     | 45  |
|                       | GTP $\gamma$ S binding, cAMP accumulation | $\beta$ arrestin2 enzyme complementation assay                               | Black-Leff operational model                   | Equal between assays                                                                                     | 60  |
| <b>Herkinorin</b>     | ERK1/2 phosphorylation                    | $\beta$ arrestin2-GFP translocation & internalization by confocal microscopy | None applied                                   | ERK1/2 activation with poor $\beta$ arrestin2 recruitment & no internalization                           | 43  |
|                       | GTP $\gamma$ S binding                    | $\beta$ arrestin2-GFP translocation +/- GRK2 by confocal microscopy          | None applied                                   | G protein with no $\beta$ arrestin2 translocation to the plasma membrane even when GRK2 is overexpressed | 45  |
|                       | cAMP accumulation +GRK2                   | $\beta$ arrestin2 BRET +GRK2                                                 | Black-Leff operational model-no data provided* | Modest G protein bias with $\beta$ arrestin2 recruitment                                                 | 46  |
| <b>Oliceridine</b>    | cAMP accumulation                         | $\beta$ arrestin2 enzyme complementation assay                               | Equiactive comparison model                    | G protein bias                                                                                           | 48  |
|                       | GTP $\gamma$ S binding, cAMP accumulation | $\beta$ arrestin2 enzyme complementation assay and BRET                      | Black-Leff operational model-no data provided* | G protein with undetectable $\beta$ arrestin2 enzyme complementation or BRET                             | 46  |
| <b>PZM21</b>          | cAMP accumulation +GRK2                   | $\beta$ arrestin2 BRET +GRK2                                                 | Black-Leff operational model-no data provided* | G protein bias                                                                                           | 46  |
|                       | GTP $\gamma$ S binding, cAMP accumulation | $\beta$ arrestin2 enzyme complementation assay and BRET                      | Black-Leff operational model-no data provided* | G protein with undetectable $\beta$ arrestin2 enzyme complementation or BRET                             | 46  |
| <b>Mitragynine</b>    | cAMP accumulation +GRK2                   | $\beta$ arrestin2 BRET +GRK2                                                 | Black-Leff operational model-no data provided* | G protein bias                                                                                           | 46  |
|                       | GTP $\gamma$ S binding                    | $\beta$ arrestin2 enzyme complementation assay                               | None applied                                   | G protein bias                                                                                           | 58  |
| <b>SR-14968</b>       | GTP $\gamma$ S binding, cAMP accumulation | $\beta$ arrestin2 enzyme complementation assay                               | Black-Leff operational model                   | G protein bias                                                                                           | 60  |
| <b>SR-17018</b>       | GTP $\gamma$ S binding, cAMP accumulation | $\beta$ arrestin2 enzyme complementation assay                               | Black-Leff operational model                   | G protein bias                                                                                           | 60  |

\*The methods state using the Black and Leff Operational model to compare bias, but no values or calculations are provided in the text. In cases where efficacy of the response is low, the manuscript (46) states that the data were not fit to the model.

GTP $\gamma$ S binding refers to 35S-GTP $\gamma$ S binding in membranes.

$\beta$ arrestin2 enzyme complementation assay (EFC) is the DiscoverX PathHunter® assay.

BRET is a Bioluminescence Resonance Energy Transfer assay

**TABLE S3. In Vivo Responses to Biased Agonists.**
**Antinociception and Tolerance**

| Compound                           | Test Subject          | Model                                                                            | Assay                                                                                                                                        | Effect Relative to Morphine                                                                                  | Ref            |
|------------------------------------|-----------------------|----------------------------------------------------------------------------------|----------------------------------------------------------------------------------------------------------------------------------------------|--------------------------------------------------------------------------------------------------------------|----------------|
| <b>Herkinorin</b>                  | Rats                  | Inflammation pain                                                                | Acute flinch response in the paw formalin test                                                                                               | Enhanced potency but localized antinociception                                                               | 44             |
|                                    |                       |                                                                                  | Tolerance flinch response in the paw formalin test                                                                                           | Decreased effect                                                                                             | 44             |
| <b>Oliceridine</b>                 | Mice                  | Central Antinociception<br>Spinal reflex<br>Antinociception                      | Hot plate latency                                                                                                                            | Enhanced potency with faster onset for antinociception                                                       | 48             |
|                                    |                       |                                                                                  | Tail flick latency                                                                                                                           | Enhance potency                                                                                              | 49             |
|                                    |                       |                                                                                  | Tail flick tolerance                                                                                                                         | Decreased effect                                                                                             | 49, 51         |
|                                    |                       |                                                                                  | Nociceptive sensitization                                                                                                                    | Decreased effect                                                                                             | 51             |
|                                    | Rats                  | Central Antinociception                                                          | Hot plate latency                                                                                                                            | Enhance potency                                                                                              | 48             |
|                                    |                       |                                                                                  | Hot plate latency                                                                                                                            | Similar effect (compared to oxycodone)                                                                       | 50             |
|                                    |                       |                                                                                  | Tail flick latency                                                                                                                           | Enhance potency                                                                                              | 48             |
|                                    | Human clinical trials | Post-operative pain<br>Opioid analgesia                                          | Hindpaw incisional model                                                                                                                     | Enhance potency                                                                                              | 48             |
|                                    |                       |                                                                                  | Cold-pain test                                                                                                                               | Enhanced analgesia with fast onset and similar duration                                                      | 52             |
|                                    |                       |                                                                                  | Post-operative pain                                                                                                                          | Average pain scores                                                                                          | Similar effect |
|                                    |                       |                                                                                  | Treatment responders using categorical and numeric rating scale (NRS) and drug demand using patient-controlled-analgesia (PCA) over 48 hours | Similar analgesic effect with fast onset and similar duration                                                | 56             |
|                                    |                       |                                                                                  | Treatment responders using categorical and numeric rating scale (NRS) and drug demand using patient-controlled-analgesia (PCA) over 24 hours | Similar analgesic effect with fast onset                                                                     | 55             |
| <b>PZM21</b>                       | Mice                  | Central Antinociception                                                          | Hot plate latency (affective)*                                                                                                               | Decreased at equal dose                                                                                      | 46             |
|                                    |                       |                                                                                  | Hot plate latency                                                                                                                            | Similar                                                                                                      | 57             |
|                                    |                       |                                                                                  | Hot plate tolerance                                                                                                                          | Similar                                                                                                      | 57             |
|                                    |                       |                                                                                  | Tail flick latency                                                                                                                           | No Response                                                                                                  | 46             |
| <b>Mitragynine and derivatives</b> | Mice                  | Spinal reflex<br>Antinociception<br>Inflammation pain<br>Central Antinociception | Acute lick response in the paw formalin test                                                                                                 | Similar                                                                                                      | 46             |
|                                    |                       |                                                                                  | Hot plate latency                                                                                                                            | Similar effect                                                                                               | 58             |
|                                    |                       |                                                                                  | Tail flick latency                                                                                                                           | Mitragynine showed decreased potency while its derivatives displayed enhanced potency with shorter duration. | 58             |
|                                    |                       |                                                                                  | Antinociception Tolerance                                                                                                                    | Mitragynine derivative showed slower development of tolerance                                                | 58             |
| <b>SR-14968</b>                    | Mice                  | Central Antinociception<br>Spinal reflex<br>Antinociception                      | Hot plate latency                                                                                                                            | Enhanced potency                                                                                             | 60             |
|                                    |                       |                                                                                  | Tail flick latency                                                                                                                           | Enhanced potency                                                                                             | 60             |
|                                    |                       |                                                                                  | Tail flick latency                                                                                                                           | Enhanced potency                                                                                             | 63             |
| <b>SR-17018</b>                    | Mice                  | Central Antinociception                                                          | Hot plate latency                                                                                                                            | Similar effect                                                                                               | 60             |
|                                    |                       |                                                                                  | Hot plate tolerance                                                                                                                          | Decreased effect                                                                                             | 62             |

**Adverse Side Effects**

|                    |      |              |                            |                        |    |
|--------------------|------|--------------|----------------------------|------------------------|----|
| <b>Oliceridine</b> | Mice | Constipation | Accumulation of fecal boli | Decreased constipation | 48 |
|                    |      |              | Accumulation of fecal boli | Similar                | 49 |

|                                    |                       |                                       |                                                                                     |                                                                                                                                            |    |
|------------------------------------|-----------------------|---------------------------------------|-------------------------------------------------------------------------------------|--------------------------------------------------------------------------------------------------------------------------------------------|----|
|                                    |                       |                                       | Small intestinal transit - orally administered charcoal meal                        | Less transit delay                                                                                                                         | 48 |
|                                    |                       |                                       | Large intestine transit - colonic bead expulsion                                    | Less transit delay                                                                                                                         | 48 |
|                                    |                       |                                       | Large intestine transit - colonic bead expulsion                                    | Similar                                                                                                                                    | 49 |
|                                    |                       | Physical dependence and withdrawal    | Naloxone-precipitated withdrawal                                                    | Similar effect but to a lesser extent                                                                                                      | 51 |
|                                    | Rats                  | Respiratory function                  | Respiratory suppression                                                             | Decreased effect                                                                                                                           | 48 |
|                                    |                       | Abuse liability                       | Intracranial self-stimulation                                                       | Similar effect                                                                                                                             | 49 |
|                                    |                       |                                       | Self-administration                                                                 | Similar effect (compared to oxycodone instead of morphine)                                                                                 | 50 |
|                                    | Human clinical trials | Respiratory function                  | Magnitude, duration, and frequency of depressed ventilatory response to hypercapnia | Similar effect but transient                                                                                                               | 52 |
|                                    |                       |                                       | Hypoventilation and respiratory suppression                                         | Decreased effect                                                                                                                           | 54 |
|                                    |                       |                                       | Respiratory safety burden (RSB) using zero-inflated gamma mixture model             | Decreased effect                                                                                                                           | 56 |
|                                    |                       |                                       | Respiratory safety burden (RSB) using zero-inflated gamma mixture model             | Similar effect                                                                                                                             | 55 |
|                                    |                       | Gastrointestinal adverse events (AEs) | Drug Effects Questionnaire (DEQ)                                                    | Decreased and less severe effect                                                                                                           | 52 |
|                                    |                       |                                       | Upper gastrointestinal effects                                                      | Decreased and less severe effect                                                                                                           | 54 |
|                                    |                       |                                       | Gastrointestinal adverse effects (AEs)                                              | Dose-related AEs but less frequent and less severe                                                                                         | 56 |
|                                    |                       |                                       | Gastrointestinal adverse effects (AEs)                                              | Dose-dependent AEs but less frequent                                                                                                       | 55 |
|                                    | Human clinical trials | Abuse liability                       | Drug Effects Questionnaire (DEQ)                                                    | Similar but with greater therapeutic index                                                                                                 | 52 |
|                                    |                       | Respiratory function                  | Magnitude, duration, and frequency of depressed ventilatory response to hypercapnia | Similar effect but transient                                                                                                               | 52 |
|                                    |                       |                                       | Hypoventilation and respiratory suppression                                         | Decreased effect                                                                                                                           | 54 |
|                                    |                       |                                       | Respiratory safety burden (RSB) using zero-inflated gamma mixture model             | Decreased effect                                                                                                                           | 56 |
| <b>PZM21</b>                       | Mice                  | Respiratory suppression               | Whole-body plethysmography                                                          | Decreased effect                                                                                                                           | 46 |
|                                    |                       |                                       | Whole-body plethysmography                                                          | Similar effect                                                                                                                             | 57 |
|                                    |                       | Respiratory suppression tolerance     | Whole-body plethysmography                                                          | Not acquired (similar to morphine in this study)                                                                                           | 57 |
|                                    |                       | Reward                                | Conditioned-place preference (CPP)                                                  | No CPP                                                                                                                                     | 46 |
|                                    |                       | Opioid-induced psychomotor effect     | Open-field locomotor activity                                                       | Decreased effect                                                                                                                           | 46 |
| <b>Mitragynine and derivatives</b> | Mice                  | Constipation                          | Small intestinal transit - orally administered charcoal meal                        | Decreased effect                                                                                                                           | 58 |
|                                    |                       | Respiratory suppression               | %O <sub>2</sub> pulse oximeter system                                               | Decreased effect                                                                                                                           | 58 |
|                                    |                       | Reward                                | Conditioned-place preference (CPP) or aversion (CPA)                                | Unclear CPP or CPA                                                                                                                         | 58 |
| <b>SR-14968</b>                    | Mice                  | Respiratory suppression               | %O <sub>2</sub> pulse oximeter system                                               | Decreased effect                                                                                                                           | 60 |
|                                    | Rats                  | Abuse-liability                       | Discriminative stimulus effects                                                     | Similar effect but with enhanced potency and efficacy ratios to produce antinociception over abuse-related discriminative stimulus effects | 63 |
| <b>SR-17018</b>                    | Mice                  | Respiratory suppression               | %O <sub>2</sub> pulse oximeter system                                               | Decreased effect                                                                                                                           | 60 |
|                                    |                       | Dependence and withdrawal             | Assessment of somatic signs from SR-17018 withdrawal                                | Faster recovery                                                                                                                            | 62 |

\*PZM21 affective response to hot plate assay.
